# Supplementary material
Source: PubMed Central journal article supplement (PMC9393066)
Supplement: web_material_kwac051.pdf [file web_material_kwac051.pdf]

## WEB MATERIAL

### Validity and Relative Validity of Alternative Methods of Assessing Physical Activity in Epidemiologic Studies: Findings From the Men's Lifestyle Validation Study

Claire H. Pernar, Andrea K. Chomistek, Junaidah B. Barnett, Kerry Ivey, Laila Al-Shaar, Susan B. Roberts, Jennifer Rood, Roger A. Fielding, Jason Block, Ruifeng Li, Walter C. Willett, Giovanni Parmigiani, Edward L. Giovannucci, Lorelei A. Mucci, and Eric B. Rimm

#### Table of Contents

|                      |                                                                                                                                                                                                                                                                                                    |    |
|----------------------|----------------------------------------------------------------------------------------------------------------------------------------------------------------------------------------------------------------------------------------------------------------------------------------------------|----|
| <b>Web Appendix</b>  |                                                                                                                                                                                                                                                                                                    | 3  |
| <b>Web Table 1.</b>  | Specific Activities and Sedentary Behaviors Included on the Physical Activity Questionnaire (PAQ) with Assigned Metabolic Equivalent Task Values.                                                                                                                                                  | 5  |
| <b>Web Table 2.</b>  | Participant Characteristics Overall and By Cohort in the Men's Lifestyle Validation Study, United States, 2011–2013.                                                                                                                                                                               | 6  |
| <b>Web Table 3.</b>  | Means and Standard Deviations for Physical Activity and Body Composition Variables Overall and By Subgroup of Age and Body Mass Index in the Men's Lifestyle Validation Study, 2011–2013.                                                                                                          | 7  |
| <b>Web Table 4.</b>  | Spearman Correlation Coefficients Comparing the Physical Activity Questionnaire and Multiple Activities Completed Over Time in 24 Hours to Doubly Labeled Water-Determined Total Daily Energy Expenditure and Physical Activity Energy Expenditure in Men's Lifestyle Validation Study, 2011–2013. | 10 |
| <b>Web Table 5.</b>  | Spearman Correlation Coefficients Comparing the Physical Activity Questionnaire and Multiple Activities Completed Over Time in 24 Hours to Doubly Labeled Water-Determined Physical Activity Level According to Age Group in Men's Lifestyle Validation Study, 2011–2013.                          | 12 |
| <b>Web Table 6.</b>  | Spearman Correlation Coefficients Comparing the Physical Activity Questionnaire and Multiple Activities Completed Over Time in 24 Hours to Doubly Labeled Water-Determined Physical Activity Level According to Body Mass Index Group in Men's Lifestyle Validation Study, 2011–2013.              | 13 |
| <b>Web Table 7.</b>  | Spearman Correlation Coefficients Comparing Each Individual Activities Completed Over Time in 24 Hours to Doubly Labeled Water-Determined Physical Activity Level in Men's Lifestyle Validation Study, 2011–2013.                                                                                  | 15 |
| <b>Web Table 8.</b>  | Spearman Correlation Coefficients Comparing Each Individual Activities Completed Over Time in 24 Hours to the Corresponding Accelerometer-Determined Activity in the Men's Lifestyle Validation Study, 2011–2013.                                                                                  | 16 |
| <b>Web Table 9.</b>  | Spearman Correlation Coefficients Comparing the Physical Activity Questionnaire, Multiple Activities Completed Over 24-Hours, and Accelerometer to Body Fat Percent Measured by Dual Energy X-ray Absorptiometry in the Men's Lifestyle Validation Study, United States, 2011–2013.                | 17 |
| <b>Web Table 10.</b> | Spearman Correlation Coefficients Comparing Each Individual Activities Completed Over 24-Hours and Accelerometer Measure to Resting Pulse Rate and Percent Body Fat as Measured by Doubly Labeled Water and Dual Energy X-ray Absorptiometry in the Men's Lifestyle Validation Study, 2011–2013.   | 18 |
| <b>Web Table 11.</b> | Validity Coefficients <sup>a</sup> Showing Correlations with True Physical Activity for Physical Activity Estimated by the Second PAQ or the Average of Multiple ACT24s with Accelerometer as the Reference Method and DLW-determined Physical Activity                                            | 19 |

Energy Expenditure as the Biomarker in the Men's Lifestyle Validation Study, 2011–2013.

**Web Table 12.**

Validity Coefficients<sup>a</sup> Showing Correlations with True Physical Activity for Physical Activity Estimated by the Second PAQ or the Average of Multiple ACT24s with Accelerometer as the Reference Method and DLW-determined Physical Activity Energy Expenditure Adjusted for Body Weight as the Biomarker in the Men's Lifestyle Validation Study, 2011–2013.

20

## WEB APPENDIX

### Methods

#### *Accelerometer*

At two time points, participants were asked to wear the accelerometer on the hip for 7 days during waking hours, except bathing or swimming, and maintain a wear time diary. For accelerometers, the epoch was set to 1 second and the low-frequency extension was enabled. The low-frequency extension widens the bandpass filter of the raw acceleration signal after a proprietary low pass anti-aliasing filter is applied.(1) This filter increases the sensitivity of the device in the low-frequency range.(2) Accelerometer data was screened for wear time using standard methods.(3, 4) Non-wear time was defined as  $\geq 60$  consecutive minutes with zero accelerometer counts, allowing up to two minutes with limited movement ( $< 200$  counts per minute, the threshold for sedentary time using triaxial counts). (5) Daily wear time was calculated by subtracting non-wear time from 24 hours. Participants' wear time diaries were used to identify days of wear. Participants' accelerometer data were included if, for each week of wear, they had at least 4 days with  $\geq 10$  hours of wear per day. Time spent in each activity category, defined by intensity, was obtained by summing minutes of each day when the count satisfied the corresponding intensity criterion. Bouts of sedentary time were defined as 15 or more consecutive minutes at the relevant threshold. Additional details have been described previously.(6)

#### *Deattenuated correlations*

Spearman correlation coefficients were deattenuated as detailed previously.(7) Measures from each assessment method are transformed into ranks on the probit scale. The method is used to correct the correlation between two methods for within person variation in one or both variables to estimate the correlation that would be seen with a large number (infinite) number of replicates. The deattenuation can be applied where some but not all individuals have at least two repeated measurements and the number of replicates vary.

#### *Method of triads*

When calculating log-transformed physical activity variables, a small number (0.001) was added to zero values. We used the method of triads to estimate the correlation of each assessment method with the latent, true physical activity level.(8) In this analysis, we assumed that the errors of the three assessment methods are uncorrelated. We made this assumption because the different assessment methods, for example the PAQ, accelerometer, and DLW, are based on different types of information. The PAQ and ACT24 are based on self-report while accelerometer-measured activity is device-based, and DLW-PAL is obtained from a urine-based laboratory assay. In addition, we ensured by design that the different methods were administered at different times over the one-year period to avoid spuriously high correlations. We further assumed positive linear correlations between the assessment methods and the true physical activity levels.(9) We obtained confidence intervals for validity coefficients using a method previously described.(10) Any estimated validity coefficients that were  $> 1$ , referred to as Heywood cases, were identified and noted in the tables. If Heywood cases occurred in a confidence interval bound, the bound was set to 1.00.

## References

1. John D, Sasaki J, Staudenmayer J, Mavilia M, Freedson PS. Comparison of raw acceleration from the GENEActiv and ActiGraph GT3X+ activity monitors. *Sensors (Basel)*. 2013;13(11):14754-63.
2. Wanner M, Martin BW, Meier F, Probst-Hensch N, Kriemler S. Effects of filter choice in GT3X accelerometer assessments of free-living activity. *Med Sci Sports Exerc*. 2013;45(1):170-7.
3. Tudor-Locke C, Camhi SM, Troiano RP. A catalog of rules, variables, and definitions applied to accelerometer data in the National Health and Nutrition Examination Survey, 2003-2006. *Prev Chronic Dis*. 2012;9:E113.
4. Troiano RP, Berrigan D, Dodd KW, Masse LC, Tilert T, McDowell M. Physical activity in the United States measured by accelerometer. *Medicine and science in sports and exercise*. 2008;40(1):181-8.
5. Aguilar-Farias N, Brown WJ, Peeters GM. ActiGraph GT3X+ cut-points for identifying sedentary behaviour in older adults in free-living environments. *J Sci Med Sport*. 2014;17(3):293-9.
6. Chomistek AK, Yuan C, Matthews CE, Troiano RP, Bowles HR, Rood J, et al. Physical Activity Assessment with the ActiGraph GT3X and Doubly Labeled Water. *Medicine and science in sports and exercise*. 2017;49(9):1935-44.
7. Rosner B, Glynn RJ. Interval estimation for rank correlation coefficients based on the probit transformation with extension to measurement error correction of correlated ranked data. *Stat Med*. 2007;26(3):633-46.
8. Kaaks RJ. Biochemical markers as additional measurements in studies of the accuracy of dietary questionnaire measurements: conceptual issues. *The American journal of clinical nutrition*. 1997;65(4 Suppl):1232S-9S.
9. Kabagambe EK, Baylin A, Allan DA, Siles X, Spiegelman D, Campos H. Application of the method of triads to evaluate the performance of food frequency questionnaires and biomarkers as indicators of long-term dietary intake. *Am J Epidemiol*. 2001;154(12):1126-35.
10. Al-Shaar L, Yuan C, Rosner B, Dean SB, Ivey KL, Clowry CM, et al. Reproducibility and Validity of a Semi-quantitative Food Frequency Questionnaire in Men Assessed by Multiple Methods. *Am J Epidemiol*. 2021;190(6):1122-32.
11. Mifflin MD, St Jeor ST, Hill LA, Scott BJ, Daugherty SA, Koh YO. A new predictive equation for resting energy expenditure in healthy individuals. *Am J Clinical Nutr*. 1990;51(2):241-7.

**Web Table 1.** Specific Activities and Sedentary Behaviors Included on the Physical Activity Questionnaire with Assigned Metabolic Equivalent Task Values.

| PAQ Item                                             | MET Value |
|------------------------------------------------------|-----------|
| Walking to work or for exercise (including golf)     |           |
| Easy (<2 mph)                                        | 2.8       |
| Normal (2-2.9 mph)                                   | 3         |
| Brisk (3-3.9 mph)                                    | 4.3       |
| Very brisk ( $\geq 4$ mph)                           | 7         |
| Jogging (slower than 10 minutes/mile)                | 7         |
| Running (10 minutes/mile or faster)                  | 11        |
| Bicycling (including stationary machine)             |           |
| Low                                                  | 4         |
| Medium                                               | 7         |
| High                                                 | 10        |
| Swimming                                             |           |
| Low                                                  | 5         |
| Medium                                               | 7         |
| High                                                 | 10        |
| Tennis                                               |           |
| Low                                                  | 5         |
| Medium                                               | 7         |
| High                                                 | 8         |
| Squash or racquetball                                | 9         |
| Weightlifting (include machines such as LifeFitness) | 5.5       |
| Arms                                                 |           |
| Legs                                                 |           |
| Moderate outdoor work (e.g., yardwork, gardening)    | 4.5       |
| Heaving outdoor work (e.g., digging, chopping)       | 5.5       |
| Lower intensity exercise (yoga, stretching, toning)  | 3         |
| Other aerobic exercise (exercise classes, etc.)      | 6         |
| Stair climbing                                       | 8.5       |
| Standing or walking around work                      | 1.8       |
| Standing or walking around home                      | 1.8       |
| Sitting at work or commuting                         | 1.3       |
| Sitting at home while watching TV/VCR/DVD            | 1.3       |
| Other sitting at home (e.g. desk, eating, computer)  | 1.3       |

MET: metabolic equivalent task; PAQ: physical activity questionnaire.

Assigned MET values adapted from the Compendium of Physical Activities, 2011. Response options for all activities except stair climbing include 13 categories ranging from “None” to “40+ Hrs.” in units of hours per week during the past year. Daily stair climbing response options include 6 categories (no flights, 1-2, 3-4, 5-9, 10-14,  $\geq 15$  flights). Daily flights converted to hours per week assuming 8 seconds per flight climbed.

**Web Table 2. Participant Characteristics Overall and By Cohort in the Men’s Lifestyle Validation Study, United States, 2011–2013.**

| <b>Variable</b>                           | <b>Overall<br/>(N=609)</b> | <b>HPFS Subset<br/>(N=437)</b> | <b>Harvard Pilgrim<br/>Subset<br/>(N=172)</b> |
|-------------------------------------------|----------------------------|--------------------------------|-----------------------------------------------|
| Age, mean (SD), years                     | 68.1 (7.6)                 | 71.6 (4.2)                     | 59.3 (7.4)                                    |
| Height, mean (SD), m                      | 1.8 (0.1)                  | 1.8 (0.1)                      | 1.8 (0.1)                                     |
| Weight, mean (SD), kg                     | 81.7 (12.3)                | 81 (12.1)                      | 83.6 (12.7)                                   |
| Weight change, mean (SD), kg <sup>c</sup> | -0.04 (2.67)               | -0.1 (2.5)                     | 0.1 (3)                                       |
| BMI, mean (SD), kg/m <sup>2</sup>         | 26.1 (3.7)                 | 26 (3.6)                       | 26.5 (3.8)                                    |
| Current smoker, % <sup>d</sup>            | 1.2                        | 1.2                            | 1.2                                           |
| African American, %                       | 2.3                        | 1.1                            | 5.2                                           |
| Harvard Pilgrim, %                        | 28.2                       | -                              | -                                             |
| Second PAQ                                |                            |                                |                                               |
| Total activity, mean (SD), MET-hr/day     | 10.4 (6.6)                 | 10.7 (6.4)                     | 9.7 (7.1)                                     |
| MVPA, mean (SD), MET-hr/day               | 7.4 (5.5)                  | 7.6 (5.4)                      | 6.7 (5.6)                                     |
| Sedentary, mean (SD), hr/day              | 4.6 (2.9)                  | 4.2 (2.6)                      | 5.6 (3.2)                                     |
| First DLW                                 |                            |                                |                                               |
| PAL, mean (SD)                            | 1.7 (0.2)                  | 1.7 (0.2)                      | 1.8 (0.3)                                     |

DXA: dual energy X-ray absorptiometry; DLW: doubly labeled water; BMI: body mass index; PAQ: physical activity questionnaire; MVPA: moderate to vigorous physical activity; MET: metabolic equivalent of task; PAL: physical activity level.

<sup>a</sup>DXA was conducted in a subset of participants residing in the Boston area (n=197).

<sup>b</sup>A subgroup (n=100) of participants in group 1 completed a second DLW measurement at approximately 9, 12, or 15 months.

<sup>c</sup>Weight change calculated as difference in reported weight between administration of first and second PAQ; missing, n=1.

<sup>d</sup>Current smoking was missing in 5 men.

**Web Table 3.** Means and Standard Deviations for Physical Activity and Body Composition Variables Overall and By Subgroup of Age and Body Mass Index in the Men's Lifestyle Validation Study (MLVS), 2011–2013.

| Variable and Measurement No.             | MLVS Cohort |                   | Age Group  |                   |            |                   | BMI Group                 |                   |                           |                   |
|------------------------------------------|-------------|-------------------|------------|-------------------|------------|-------------------|---------------------------|-------------------|---------------------------|-------------------|
|                                          | All         |                   | Age <70 yr |                   | Age ≥70 yr |                   | BMI <25 kg/m <sup>2</sup> |                   | BMI ≥25 kg/m <sup>2</sup> |                   |
|                                          | N           | Mean (SD)         | N          | Mean (SD)         | N          | Mean (SD)         | N                         | Mean (SD)         | N                         | Mean (SD)         |
| PAL                                      |             |                   |            |                   |            |                   |                           |                   |                           |                   |
| DLW no. 1                                | 609         | 1.7 (0.2)         | 352        | 1.8 (0.2)         | 257        | 1.7 (0.2)         | 258                       | 1.8 (0.2)         | 351                       | 1.7 (0.2)         |
| DLW no. 2                                | 100         | 1.8 (0.3)         | 81         | 1.8 (0.3)         | 19         | 1.7 (0.2)         | 43                        | 1.8 (0.3)         | 57                        | 1.8 (0.2)         |
| TDEE, kcal/day                           |             |                   |            |                   |            |                   |                           |                   |                           |                   |
| DLW no. 1                                | 609         | 2766.6 (429.1)    | 352        | 2868.7 (435)      | 257        | 2626.9 (379.3)    | 258                       | 2672.6 (408.1)    | 351                       | 2835.7 (431.6)    |
| DLW no. 2                                | 100         | 2957 (481.7)      | 81         | 3009.1 (499.7)    | 19         | 2734.7 (319)      | 43                        | 2847.9 (536.9)    | 57                        | 3039.3 (421.9)    |
| PAEE, kcal/day                           |             |                   |            |                   |            |                   |                           |                   |                           |                   |
| DLW no. 1                                | 609         | 901.5 (335.3)     | 352        | 964.1 (342.5)     | 257        | 815.7 (305.6)     | 258                       | 901 (333)         | 351                       | 901.9 (337.5)     |
| DLW no. 2                                | 100         | 1035.6 (388.3)    | 81         | 1068.5 (412)      | 19         | 895.1 (221.1)     | 43                        | 1019.4 (440.1)    | 57                        | 1047.7 (347.7)    |
| Total percent fat, %                     |             |                   |            |                   |            |                   |                           |                   |                           |                   |
| DLW no. 1                                | 609         | 27.9 (6.6)        | 352        | 27.1 (6.3)        | 257        | 29.1 (6.8)        | 258                       | 24.3 (5.5)        | 351                       | 30.6 (6.1)        |
| DLW no. 2                                | 100         | 26.8 (6.1)        | 81         | 25.8 (6)          | 19         | 31 (5)            | 43                        | 22.9 (4.8)        | 57                        | 29.7 (5.4)        |
| DXA no. 1                                | 197         | 23.2 (5.2)        | 171        | 22.7 (5.1)        | 26         | 26.5 (4.6)        | 76                        | 19.6 (3.8)        | 121                       | 25.5 (4.6)        |
| DXA no. 2                                | 99          | 23.1 (4.9)        | 82         | 22.4 (4.7)        | 17         | 26.1 (4.9)        | 42                        | 19.7 (3.5)        | 57                        | 25.5 (4.3)        |
| Total physical activity <sup>a</sup>     |             |                   |            |                   |            |                   |                           |                   |                           |                   |
| PAQ (1), MET-hr/day                      | 609         | 10.6 (11.2)       | 352        | 10.6 (9.4)        | 257        | 10.6 (13.4)       | 258                       | 11 (10.3)         | 351                       | 10.3 (11.8)       |
| PAQ (2), MET-hr/day                      | 609         | 10.4 (6.6)        | 352        | 10.4 (6.5)        | 257        | 10.5 (6.7)        | 258                       | 11.1 (6.6)        | 351                       | 10 (6.6)          |
| PAQ (Avg), MET-hr/day                    | 609         | 10.5 (7.6)        | 352        | 10.5 (7)          | 257        | 10.6 (8.4)        | 258                       | 11 (7.5)          | 351                       | 10.2 (7.7)        |
| ACT24 (1), MET-hr/day                    | 540         | 18.8 (11.6)       | 313        | 19.3 (12.3)       | 227        | 18.2 (10.5)       | 225                       | 19.7 (11.8)       | 315                       | 18.2 (11.5)       |
| ACT24 (2), MET-hr/day                    | 524         | 16.5 (9.8)        | 300        | 17 (10.4)         | 224        | 15.8 (9)          | 219                       | 16.7 (9.6)        | 305                       | 16.3 (10)         |
| ACT24 (3), MET-hr/day                    | 528         | 15.3 (9.9)        | 300        | 15.4 (9.9)        | 228        | 15.2 (9.8)        | 219                       | 15.5 (9.6)        | 309                       | 15.2 (10.1)       |
| ACT24 (4), MET-hr/day                    | 540         | 16.2 (9.9)        | 308        | 16.6 (10.7)       | 232        | 15.8 (8.9)        | 232                       | 17.2 (9.8)        | 308                       | 15.5 (10)         |
| ACT24 (Avg), MET-hr/day                  | 609         | 17.0 (7.9)        | 352        | 17.3 (8.3)        | 257        | 16.5 (7.4)        | 258                       | 17.7 (8.3)        | 351                       | 16.4 (7.7)        |
| Accelerometer (1), TAC/day               | 609         | 596,032 (193,831) | 352        | 625,997 (189,005) | 257        | 554,991 (193,195) | 258                       | 637,203 (191,489) | 351                       | 565,770 (190,191) |
| Accelerometer (2), TAC/day               | 516         | 574,118 (186,905) | 297        | 599,444 (186,078) | 219        | 539,770 (182,902) | 225                       | 611,868 (185,490) | 291                       | 544,929 (183,031) |
| Accelerometer (Avg), TAC/day             | 609         | 587,021 (181,709) | 352        | 615,693 (179,737) | 257        | 547,750 (177,331) | 258                       | 629,995 (181,592) | 351                       | 555,433 (175,448) |
| MVPA                                     |             |                   |            |                   |            |                   |                           |                   |                           |                   |
| PAQ (1), MET-hr/day                      | 609         | 7.4 (9.3)         | 352        | 7.3 (8.7)         | 257        | 7.6 (10.1)        | 258                       | 8.1 (10)          | 351                       | 6.9 (8.8)         |
| PAQ (2), MET-hr/day                      | 609         | 7.4 (5.5)         | 352        | 7.1 (5.3)         | 257        | 7.8 (5.8)         | 258                       | 8.2 (5.7)         | 351                       | 6.8 (5.3)         |
| PAQ (Avg), MET-hr/day                    | 609         | 7.4 (6.4)         | 352        | 7.2 (6.2)         | 257        | 7.7 (6.7)         | 258                       | 8.1 (7)           | 351                       | 6.9 (5.9)         |
| PAQ (1), hr/day                          | 609         | 1.4 (1.0)         | 352        | 1.3 (0.9)         | 257        | 1.5 (1.2)         | 258                       | 1.4 (1)           | 351                       | 1.3 (1)           |
| PAQ (2), hr/day                          | 609         | 1.4 (1.1)         | 352        | 1.3 (1)           | 257        | 1.6 (1.1)         | 258                       | 1.5 (1.1)         | 351                       | 1.4 (1.1)         |
| PAQ (Avg), hr/day                        | 609         | 1.4 (0.9)         | 352        | 1.3 (0.9)         | 257        | 1.5 (1)           | 258                       | 1.5 (0.9)         | 351                       | 1.3 (0.9)         |
| ACT24 (1), MET-hr/day                    | 540         | 12.6 (11.7)       | 313        | 12.7 (12.6)       | 227        | 12.5 (10.3)       | 225                       | 12.9 (11.6)       | 315                       | 12.4 (11.7)       |
| ACT24 (2), MET-hr/day                    | 524         | 10.3 (10.1)       | 300        | 10.4 (10.8)       | 224        | 10.2 (9.2)        | 219                       | 9.9 (9.3)         | 305                       | 10.6 (10.6)       |
| ACT24 (3), MET-hr/day                    | 528         | 9.5 (9.9)         | 300        | 9.4 (9.8)         | 228        | 9.5 (9.9)         | 219                       | 9.5 (9.5)         | 309                       | 9.4 (10.1)        |
| ACT24 (4), MET-hr/day                    | 540         | 10.0 (9.9)        | 308        | 10.2 (10.6)       | 232        | 9.7 (8.8)         | 232                       | 10.8 (9.5)        | 308                       | 9.4 (10.1)        |
| ACT24 (Avg), MET-hr/day                  | 609         | 10.7 (7.7)        | 352        | 10.8 (8)          | 257        | 10.6 (7.3)        | 258                       | 11.1 (7.9)        | 351                       | 10.4 (7.6)        |
| ACT24 (1), hr/day                        | 540         | 2.7 (2.4)         | 313        | 2.6 (2.5)         | 227        | 2.7 (2.2)         | 225                       | 2.7 (2.3)         | 315                       | 2.7 (2.5)         |
| ACT24 (2), hr/day                        | 524         | 2.2 (2.1)         | 300        | 2.2 (2.2)         | 224        | 2.3 (2)           | 219                       | 2.1 (2)           | 305                       | 2.3 (2.2)         |
| ACT24 (3), hr/day                        | 528         | 2.1 (2.0)         | 300        | 2.1 (2.1)         | 228        | 2 (2)             | 219                       | 2 (1.9)           | 309                       | 2.1 (2.1)         |
| ACT24 (4), hr/day                        | 540         | 2.2 (2.1)         | 308        | 2.2 (2.3)         | 232        | 2.1 (1.9)         | 232                       | 2.3 (2)           | 308                       | 2.1 (2.2)         |
| ACT24 (Avg), hr/day                      | 609         | 2.3 (1.6)         | 352        | 2.3 (1.7)         | 257        | 2.3 (1.5)         | 258                       | 2.3 (1.6)         | 351                       | 2.3 (1.6)         |
| Accelerometer (1), hr/day <sup>b</sup>   | 609         | 0.85 (0.51)       | 352        | 0.94 (0.49)       | 257        | 0.72 (0.5)        | 258                       | 0.93 (0.53)       | 351                       | 0.79 (0.48)       |
| Accelerometer (2), hr/day <sup>b</sup>   | 516         | 0.79 (0.48)       | 297        | 0.87 (0.48)       | 219        | 0.68 (0.45)       | 225                       | 0.86 (0.49)       | 291                       | 0.74 (0.46)       |
| Accelerometer (Avg), hr/day <sup>b</sup> | 609         | 0.83 (0.47)       | 352        | 0.92 (0.47)       | 257        | 0.7 (0.45)        | 258                       | 0.91 (0.49)       | 351                       | 0.76 (0.45)       |
| Vigorous activity                        |             |                   |            |                   |            |                   |                           |                   |                           |                   |
| PAQ (1), MET-hr/day                      | 609         | 2.6 (3.6)         | 352        | 2.9 (3.9)         | 257        | 2.1 (3.2)         | 258                       | 3.1 (4.1)         | 351                       | 2.1 (3.1)         |
| PAQ (2), MET-hr/day                      | 609         | 2.7 (3.5)         | 352        | 2.9 (3.6)         | 257        | 2.4 (3.5)         | 258                       | 3.3 (4)           | 351                       | 2.2 (3.1)         |
| PAQ (Avg), MET-hr/day                    | 609         | 2.6 (3.3)         | 352        | 2.9 (3.5)         | 257        | 2.2 (3.1)         | 258                       | 3.2 (3.8)         | 351                       | 2.1 (2.9)         |

**Web Table 3.** Means and Standard Deviations for Physical Activity and Body Composition Variables Overall and By Subgroup of Age and Body Mass Index in the Men's Lifestyle Validation Study (MLVS), 2011–2013.

| Variable and Measurement No.             | MLVS Cohort |             | Age Group  |             |            |             | BMI Group                 |             |                           |             |
|------------------------------------------|-------------|-------------|------------|-------------|------------|-------------|---------------------------|-------------|---------------------------|-------------|
|                                          | All         |             | Age <70 yr |             | Age ≥70 yr |             | BMI <25 kg/m <sup>2</sup> |             | BMI ≥25 kg/m <sup>2</sup> |             |
|                                          | N           | Mean (SD)   | N          | Mean (SD)   | N          | Mean (SD)   | N                         | Mean (SD)   | N                         | Mean (SD)   |
| PAQ (1), hr/day                          | 609         | 0.3 (0.4)   | 352        | 0.4 (0.5)   | 257        | 0.3 (0.4)   | 258                       | 0.4 (0.5)   | 351                       | 0.3 (0.4)   |
| PAQ (2), hr/day                          | 609         | 0.3 (0.4)   | 352        | 0.3 (0.4)   | 257        | 0.3 (0.4)   | 258                       | 0.4 (0.5)   | 351                       | 0.3 (0.4)   |
| PAQ (Avg), hr/day                        | 609         | 0.3 (0.4)   | 352        | 0.4 (0.4)   | 257        | 0.3 (0.4)   | 258                       | 0.4 (0.4)   | 351                       | 0.3 (0.4)   |
| ACT24 (1), MET-hr/day                    | 540         | 4.2 (8.9)   | 313        | 4.9 (10.1)  | 227        | 3.4 (6.9)   | 225                       | 5 (9.2)     | 315                       | 3.7 (8.7)   |
| ACT24 (2), MET-hr/day                    | 524         | 3.2 (7.0)   | 300        | 3.7 (7.4)   | 224        | 2.6 (6.4)   | 219                       | 3.4 (6.1)   | 305                       | 3.1 (7.6)   |
| ACT24 (3), MET-hr/day                    | 528         | 2.6 (6.7)   | 300        | 2.5 (6.6)   | 228        | 2.9 (6.9)   | 219                       | 3 (6.8)     | 309                       | 2.4 (6.7)   |
| ACT24 (4), MET-hr/day                    | 540         | 2.6 (6.1)   | 308        | 2.8 (6.7)   | 232        | 2.4 (5.1)   | 232                       | 3.5 (6.8)   | 308                       | 2 (5.4)     |
| ACT24 (Avg), MET-hr/day                  | 609         | 3.3 (5.2)   | 352        | 3.5 (5.3)   | 257        | 3 (5.2)     | 258                       | 3.9 (5.6)   | 351                       | 2.8 (4.9)   |
| ACT24 (1), hr/day                        | 540         | 0.6 (1.3)   | 313        | 0.7 (1.5)   | 227        | 0.5 (1)     | 225                       | 0.7 (1.4)   | 315                       | 0.5 (1.3)   |
| ACT24 (2), hr/day                        | 524         | 0.5 (1.0)   | 300        | 0.5 (1.1)   | 224        | 0.4 (1)     | 219                       | 0.5 (0.9)   | 305                       | 0.5 (1.1)   |
| ACT24 (3), hr/day                        | 528         | 0.4 (0.9)   | 300        | 0.3 (0.9)   | 228        | 0.4 (1)     | 219                       | 0.4 (1)     | 309                       | 0.3 (0.9)   |
| ACT24 (4), hr/day                        | 540         | 0.4 (0.9)   | 308        | 0.4 (1)     | 232        | 0.4 (0.8)   | 232                       | 0.5 (1)     | 308                       | 0.3 (0.8)   |
| ACT24 (Avg), hr/day                      | 609         | 0.5 (0.8)   | 352        | 0.5 (0.8)   | 257        | 0.4 (0.8)   | 258                       | 0.6 (0.8)   | 351                       | 0.4 (0.7)   |
| Accelerometer (1), hr/day <sup>b</sup>   | 609         | 0.07 (0.14) | 352        | 0.09 (0.16) | 257        | 0.05 (0.12) | 258                       | 0.08 (0.13) | 351                       | 0.06 (0.15) |
| Accelerometer (2), hr/day <sup>b</sup>   | 516         | 0.07 (0.13) | 297        | 0.09 (0.15) | 219        | 0.04 (0.09) | 225                       | 0.08 (0.14) | 291                       | 0.06 (0.12) |
| Accelerometer (Avg), hr/day <sup>b</sup> | 609         | 0.07 (0.13) | 352        | 0.09 (0.14) | 257        | 0.04 (0.1)  | 258                       | 0.09 (0.13) | 351                       | 0.06 (0.12) |
| <i>Moderate activity</i>                 |             |             |            |             |            |             |                           |             |                           |             |
| PAQ (1), MET-hr/day                      | 609         | 4.5 (4.2)   | 352        | 4.1 (3.6)   | 257        | 5.1 (4.9)   | 258                       | 4.5 (3.9)   | 351                       | 4.5 (4.4)   |
| PAQ (2), MET-hr/day                      | 609         | 4.7 (4.2)   | 352        | 4.2 (3.8)   | 257        | 5.4 (4.6)   | 258                       | 4.9 (4.2)   | 351                       | 4.6 (4.2)   |
| PAQ (Avg), MET-hr/day                    | 609         | 4.6 (3.7)   | 352        | 4.2 (3.4)   | 257        | 5.3 (4.1)   | 258                       | 4.7 (3.6)   | 351                       | 4.6 (3.8)   |
| PAQ (1), hr/day                          | 609         | 1.0 (0.9)   | 352        | 0.9 (0.8)   | 257        | 1.2 (1.1)   | 258                       | 1 (0.9)     | 351                       | 1 (1)       |
| PAQ (2), hr/day                          | 609         | 1.1 (0.9)   | 352        | 1 (0.9)     | 257        | 1.3 (1)     | 258                       | 1.1 (0.9)   | 351                       | 1.1 (1)     |
| PAQ (Avg), hr/day                        | 609         | 1.1 (0.8)   | 352        | 1 (0.8)     | 257        | 1.2 (0.9)   | 258                       | 1.1 (0.8)   | 351                       | 1.1 (0.9)   |
| ACT24 (1), MET-hr/day                    | 540         | 8.4 (8.2)   | 313        | 7.8 (8.4)   | 227        | 9.1 (8)     | 225                       | 7.9 (7.5)   | 315                       | 8.6 (8.7)   |
| ACT24 (2), MET-hr/day                    | 524         | 7.1 (7.9)   | 300        | 6.8 (8)     | 224        | 7.6 (7.7)   | 219                       | 6.5 (7.2)   | 305                       | 7.5 (8.3)   |
| ACT24 (3), MET-hr/day                    | 528         | 6.8 (7.9)   | 300        | 6.9 (7.9)   | 228        | 6.7 (7.9)   | 219                       | 6.5 (7.2)   | 309                       | 7 (8.3)     |
| ACT24 (4), MET-hr/day                    | 540         | 7.3 (8.0)   | 308        | 7.4 (8.6)   | 232        | 7.3 (7.1)   | 232                       | 7.2 (7.4)   | 308                       | 7.4 (8.5)   |
| ACT24 (Avg), MET-hr/day                  | 609         | 7.4 (5.6)   | 352        | 7.3 (5.8)   | 257        | 7.6 (5.5)   | 258                       | 7.2 (5.7)   | 351                       | 7.6 (5.6)   |
| ACT24 (1), hr/day                        | 540         | 2.1 (2.1)   | 313        | 1.9 (2.1)   | 227        | 2.2 (2)     | 225                       | 2 (1.9)     | 315                       | 2.1 (2.2)   |
| ACT24 (2), hr/day                        | 524         | 1.8 (1.9)   | 300        | 1.7 (2)     | 224        | 1.9 (1.9)   | 219                       | 1.6 (1.8)   | 305                       | 1.9 (2)     |
| ACT24 (3), hr/day                        | 528         | 1.7 (1.9)   | 300        | 1.7 (2)     | 228        | 1.6 (1.8)   | 219                       | 1.6 (1.7)   | 309                       | 1.7 (2)     |
| ACT24 (4), hr/day                        | 540         | 1.8 (1.9)   | 308        | 1.8 (2.1)   | 232        | 1.8 (1.7)   | 232                       | 1.8 (1.8)   | 308                       | 1.8 (2.1)   |
| ACT24 (Avg), hr/day                      | 609         | 1.8 (1.4)   | 352        | 1.8 (1.4)   | 257        | 1.9 (1.3)   | 258                       | 1.8 (1.4)   | 351                       | 1.9 (1.4)   |
| Accelerometer (1), hr/day <sup>b</sup>   | 609         | 0.78 (0.46) | 352        | 0.85 (0.44) | 257        | 0.67 (0.47) | 258                       | 0.85 (0.49) | 351                       | 0.72 (0.43) |
| Accelerometer (2), hr/day <sup>b</sup>   | 516         | 0.72 (0.44) | 297        | 0.78 (0.44) | 219        | 0.64 (0.42) | 225                       | 0.78 (0.44) | 291                       | 0.69 (0.43) |
| Accelerometer (Avg), hr/day <sup>b</sup> | 609         | 0.76 (0.43) | 352        | 0.83 (0.42) | 257        | 0.66 (0.42) | 258                       | 0.82 (0.44) | 351                       | 0.71 (0.41) |
| <i>Sedentary time</i>                    |             |             |            |             |            |             |                           |             |                           |             |
| PAQ (1), hr/day                          | 609         | 4.8 (3.0)   | 352        | 5.4 (3.2)   | 257        | 4.1 (2.5)   | 258                       | 4.9 (3)     | 351                       | 4.8 (3)     |
| PAQ (2), hr/day                          | 609         | 4.6 (2.9)   | 352        | 5 (2.9)     | 257        | 4.1 (2.7)   | 258                       | 4.7 (2.7)   | 351                       | 4.6 (3)     |
| PAQ (Avg), hr/day                        | 609         | 4.7 (2.6)   | 352        | 5.2 (2.7)   | 257        | 4.1 (2.3)   | 258                       | 4.8 (2.5)   | 351                       | 4.7 (2.6)   |
| ACT24 (1), hr/day                        | 540         | 8.9 (3.4)   | 313        | 9 (3.6)     | 227        | 8.6 (3.2)   | 225                       | 8.6 (3.4)   | 315                       | 9 (3.4)     |
| ACT24 (2), hr/day                        | 524         | 9.0 (3.2)   | 300        | 9.1 (3.4)   | 224        | 8.9 (2.9)   | 219                       | 8.9 (3.3)   | 305                       | 9.1 (3.2)   |
| ACT24 (3), hr/day                        | 528         | 9.1 (3.2)   | 300        | 9.4 (3.4)   | 228        | 8.7 (2.9)   | 219                       | 9.1 (3.4)   | 309                       | 9.1 (3.1)   |
| ACT24 (4), hr/day                        | 540         | 8.8 (3.3)   | 308        | 9 (3.6)     | 232        | 8.6 (3)     | 232                       | 8.5 (3.4)   | 308                       | 9.1 (3.2)   |
| ACT24 (Avg), hr/day                      | 609         | 8.9 (2.6)   | 352        | 9.1 (2.8)   | 257        | 8.7 (2.2)   | 258                       | 8.6 (2.7)   | 351                       | 9.1 (2.5)   |
| <i>Including every minute</i>            |             |             |            |             |            |             |                           |             |                           |             |
| Accelerometer (1), hr/day                | 609         | 8.5 (1.5)   | 352        | 8.5 (1.5)   | 257        | 8.4 (1.4)   | 258                       | 8.2 (1.5)   | 351                       | 8.6 (1.5)   |
| Accelerometer (2), hr/day                | 516         | 8.6 (1.5)   | 297        | 8.7 (1.5)   | 219        | 8.5 (1.5)   | 225                       | 8.4 (1.5)   | 291                       | 8.8 (1.5)   |
| Accelerometer (Avg), hr/day              | 609         | 8.5 (1.4)   | 352        | 8.6 (1.5)   | 257        | 8.4 (1.4)   | 258                       | 8.3 (1.4)   | 351                       | 8.7 (1.4)   |
| <i>Including bouts ≥15 min</i>           |             |             |            |             |            |             |                           |             |                           |             |
| Accelerometer (1), hr/day                | 609         | 4.5 (1.6)   | 352        | 4.4 (1.6)   | 257        | 4.7 (1.6)   | 258                       | 4.2 (1.5)   | 351                       | 4.8 (1.7)   |



**Web Table 3.** Means and Standard Deviations for Physical Activity and Body Composition Variables Overall and By Subgroup of Age and Body Mass Index in the Men's Lifestyle Validation Study (MLVS), 2011–2013.

| Variable and Measurement No. | MLVS Cohort |            | Age Group  |            |            |            | BMI Group                 |            |                           |            |
|------------------------------|-------------|------------|------------|------------|------------|------------|---------------------------|------------|---------------------------|------------|
|                              | All         |            | Age <70 yr |            | Age ≥70 yr |            | BMI <25 kg/m <sup>2</sup> |            | BMI ≥25 kg/m <sup>2</sup> |            |
|                              | N           | Mean (SD)  | N          | Mean (SD)  | N          | Mean (SD)  | N                         | Mean (SD)  | N                         | Mean (SD)  |
| Accelerometer (2), hr/day    | 516         | 4.7 (1.6)  | 297        | 4.5 (1.6)  | 219        | 4.8 (1.6)  | 225                       | 4.4 (1.6)  | 291                       | 4.9 (1.6)  |
| Accelerometer (Avg), hr/day  | 609         | 4.6 (1.5)  | 352        | 4.5 (1.6)  | 257        | 4.8 (1.5)  | 258                       | 4.3 (1.5)  | 351                       | 4.8 (1.5)  |
| RPR, beats/min <sup>c</sup>  |             |            |            |            |            |            |                           |            |                           |            |
| RPR (1)                      | 464         | 63.7 (8.6) | 279        | 63.9 (8.7) | 185        | 63.3 (8.4) | 216                       | 62.4 (8.1) | 248                       | 64.7 (8.8) |
| RPR (2)                      | 469         | 63.0 (7.9) | 283        | 63.2 (8.0) | 186        | 62.8 (7.8) | 222                       | 61.5 (7.3) | 247                       | 64.3 (8.2) |
| RPR (3)                      | 407         | 63.3 (8.3) | 241        | 63.8 (8.5) | 166        | 62.4 (7.9) | 197                       | 62.4 (8.1) | 210                       | 64.1 (8.4) |
| RPR (4)                      | 468         | 63.6 (8.5) | 284        | 63.8 (8.7) | 184        | 63.2 (8.1) | 216                       | 62.1 (8.1) | 252                       | 64.8 (8.6) |
| RPR (Avg)                    | 479         | 63.4 (7.2) | 291        | 63.7 (7.5) | 188        | 63.0 (6.9) | 223                       | 62.1 (6.9) | 256                       | 64.6 (7.4) |

TDEE: total daily energy expenditure; PAEE: physical activity energy expenditure; RPR: resting pulse rate.

<sup>a</sup>Total activity determined by PAQ and ACT24 is based on active MET-hrs/day (i.e., not including sedentary behavior).

<sup>b</sup>MVPA, vigorous, and moderate activity were calculated including every minute.

<sup>c</sup>Men who reported taking anti-hypertensive medications at baseline were excluded.

**Web Table 4.** Spearman Correlation Coefficients Comparing the Physical Activity Questionnaire and Multiple Activities Completed Over Time in 24 Hours to Doubly Labeled Water-Determined Total Daily Energy Expenditure and Physical Activity Energy Expenditure in Men’s Lifestyle Validation Study, 2011–2013 (N=609<sup>a</sup>).

| Variable and Measurement No. | DLW-determined TDEE |                           |                | DLW-determined PAEE <sup>b</sup> |                           |                |
|------------------------------|---------------------|---------------------------|----------------|----------------------------------|---------------------------|----------------|
|                              | Age-Adjusted        | Deattenuated Age-Adjusted | 95% CI         | Age-Adjusted                     | Deattenuated Age-Adjusted | 95% CI         |
| Total activity, MET-hr/day   |                     |                           |                |                                  |                           |                |
| PAQ (1)                      | 0.25                | 0.29                      | (0.20, 0.37)   | 0.33                             | 0.39                      | (0.31, 0.47)   |
| PAQ (2)                      | 0.25                | 0.28                      | (0.19, 0.36)   | 0.34                             | 0.40                      | (0.32, 0.48)   |
| PAQ (Avg)                    | 0.27                | 0.31                      | (0.23, 0.38)   | 0.37                             | 0.44                      | (0.36, 0.51)   |
| ACT24 (2)                    | 0.21                | 0.24                      | (0.15, 0.33)   | 0.27                             | 0.32                      | (0.23, 0.40)   |
| ACT24 (Avg)                  | 0.29                | 0.33                      | (0.25, 0.40)   | 0.35                             | 0.42                      | (0.33, 0.49)   |
| MVPA, MET-hr/day             |                     |                           |                |                                  |                           |                |
| PAQ (1)                      | 0.28                | 0.31                      | (0.23, 0.39)   | 0.36                             | 0.43                      | (0.35, 0.51)   |
| PAQ (2)                      | 0.26                | 0.30                      | (0.21, 0.37)   | 0.37                             | 0.43                      | (0.35, 0.51)   |
| PAQ (Avg)                    | 0.29                | 0.33                      | (0.25, 0.40)   | 0.39                             | 0.47                      | (0.38, 0.54)   |
| ACT24 (2)                    | 0.24                | 0.27                      | (0.18, 0.36)   | 0.28                             | 0.33                      | (0.24, 0.41)   |
| ACT24 (Avg)                  | 0.32                | 0.35                      | (0.27, 0.43)   | 0.37                             | 0.42                      | (0.34, 0.50)   |
| Vigorous, MET-hr/day         |                     |                           |                |                                  |                           |                |
| PAQ (1)                      | 0.19                | 0.21                      | (0.12, 0.30)   | 0.30                             | 0.35                      | (0.27, 0.43)   |
| PAQ (2)                      | 0.18                | 0.20                      | (0.11, 0.29)   | 0.29                             | 0.34                      | (0.25, 0.42)   |
| PAQ (Avg)                    | 0.19                | 0.22                      | (0.13, 0.30)   | 0.30                             | 0.36                      | (0.28, 0.44)   |
| ACT24 (2)                    | 0.13                | 0.14                      | (0.06, 0.23)   | 0.17                             | 0.19                      | (0.10, 0.29)   |
| ACT24 (Avg)                  | 0.22                | 0.25                      | (0.16, 0.33)   | 0.28                             | 0.32                      | (0.24, 0.40)   |
| Moderate, MET-hr/day         |                     |                           |                |                                  |                           |                |
| PAQ (1)                      | 0.16                | 0.17                      | (0.09, 0.26)   | 0.19                             | 0.22                      | (0.13, 0.31)   |
| PAQ (2)                      | 0.16                | 0.18                      | (0.10, 0.27)   | 0.22                             | 0.26                      | (0.17, 0.35)   |
| PAQ (Avg)                    | 0.18                | 0.20                      | (0.11, 0.29)   | 0.23                             | 0.27                      | (0.18, 0.36)   |
| ACT24 (2)                    | 0.17                | 0.19                      | (0.11, 0.28)   | 0.18                             | 0.22                      | (0.12, 0.31)   |
| ACT24 (Avg)                  | 0.22                | 0.24                      | (0.16, 0.33)   | 0.25                             | 0.29                      | (0.20, 0.37)   |
| Sedentary, hr/day            |                     |                           |                |                                  |                           |                |
| PAQ (1)                      | -0.09               | -0.10                     | (-0.18, -0.02) | -0.11                            | -0.13                     | (-0.21, -0.04) |
| PAQ (2)                      | -0.09               | -0.10                     | (-0.18, -0.02) | -0.13                            | -0.15                     | (-0.24, -0.06) |
| PAQ (Avg)                    | -0.10               | -0.11                     | (-0.20, -0.03) | -0.14                            | -0.16                     | (-0.25, -0.07) |
| ACT24 (2)                    | -0.10               | -0.11                     | (-0.20, -0.02) | -0.14                            | -0.17                     | (-0.26, -0.07) |
| ACT24 (Avg)                  | -0.14               | -0.16                     | (-0.25, -0.08) | -0.19                            | -0.22                     | (-0.31, -0.13) |

DLW: doubly labeled water; PAL: physical activity level; CI: confidence interval; PAQ: physical activity questionnaire; ACT24: Activities Completed Over Time in 24 Hours; PAQ (Avg) indicates average of first and second questionnaires; ACT24 (Avg) indicates average of up to four 24-hour recalls.

<sup>a</sup>n=524 men for second ACT24 recall.

<sup>b</sup>PAEE was estimated from TDEE by subtracting resting metabolic rate and the thermic effect of food. Resting metabolic rate was predicted based on age, sex, height, and weight as described by Mifflin et al. (11).

**Web Table 5.** Spearman Correlation Coefficients Comparing the Physical Activity Questionnaire and Multiple Activities Completed Over Time in 24 Hours to Doubly Labeled Water-Determined Physical Activity Level According to Age Group in Men's Lifestyle Validation Study, 2011–2013 (N=609).

| Variable and<br>Measurement No. | DLW-determined PAL <sup>a</sup> |                              |              |
|---------------------------------|---------------------------------|------------------------------|--------------|
|                                 | Age-Adjusted                    | Deattenuated<br>Age-Adjusted | 95% CI       |
| <b>Total activity</b>           |                                 |                              |              |
| Age < 70 yr                     |                                 |                              |              |
| PAQ (1)                         | 0.40                            | 0.47                         | (0.37, 0.57) |
| PAQ (2)                         | 0.45                            | 0.53                         | (0.42, 0.62) |
| PAQ (Avg)                       | 0.46                            | 0.55                         | (0.43, 0.64) |
| ACT24 (2)                       | 0.26                            | 0.30                         | (0.18, 0.42) |
| ACT24 (Avg)                     | 0.34                            | 0.41                         | (0.30, 0.51) |
| Age ≥ 70 yr                     |                                 |                              |              |
| PAQ (1)                         | 0.37                            | 0.33                         | (0.21, 0.44) |
| PAQ (2)                         | 0.29                            | 0.31                         | (0.18, 0.42) |
| PAQ (Avg)                       | 0.37                            | 0.35                         | (0.22, 0.45) |
| ACT24 (2)                       | 0.32                            | 0.35                         | (0.22, 0.47) |
| ACT24 (Avg)                     | 0.39                            | 0.42                         | (0.31, 0.53) |
| <b>MVPA</b>                     |                                 |                              |              |
| Age < 70 yr                     |                                 |                              |              |
| PAQ (1)                         | 0.42                            | 0.50                         | (0.38, 0.59) |
| PAQ (2)                         | 0.47                            | 0.56                         | (0.45, 0.65) |
| PAQ (Avg)                       | 0.48                            | 0.57                         | (0.46, 0.66) |
| ACT24 (2)                       | 0.28                            | 0.32                         | (0.19, 0.43) |
| ACT24 (Avg)                     | 0.34                            | 0.40                         | (0.29, 0.50) |
| Age ≥ 70 yr                     |                                 |                              |              |
| PAQ (1)                         | 0.35                            | 0.38                         | (0.27, 0.49) |
| PAQ (2)                         | 0.31                            | 0.34                         | (0.21, 0.45) |
| PAQ (Avg)                       | 0.36                            | 0.39                         | (0.27, 0.49) |
| ACT24 (2)                       | 0.30                            | 0.32                         | (0.19, 0.44) |
| ACT24 (Avg)                     | 0.40                            | 0.44                         | (0.32, 0.54) |
| <b>Vigorous</b>                 |                                 |                              |              |
| Age < 70 yr                     |                                 |                              |              |
| PAQ (1)                         | 0.40                            | 0.47                         | (0.36, 0.56) |
| PAQ (2)                         | 0.38                            | 0.45                         | (0.35, 0.55) |
| PAQ (Avg)                       | 0.41                            | 0.49                         | (0.37, 0.58) |
| ACT24 (2)                       | 0.23                            | 0.26                         | (0.13, 0.37) |
| ACT24 (Avg)                     | 0.30                            | 0.36                         | (0.24, 0.46) |
| Age ≥ 70 yr                     |                                 |                              |              |
| PAQ (1)                         | 0.29                            | 0.30                         | (0.18, 0.42) |
| PAQ (2)                         | 0.28                            | 0.30                         | (0.18, 0.41) |
| PAQ (Avg)                       | 0.29                            | 0.31                         | (0.18, 0.42) |
| ACT24 (2)                       | 0.18                            | 0.19                         | (0.06, 0.33) |
| ACT24 (Avg)                     | 0.31                            | 0.33                         | (0.20, 0.44) |
| <b>Moderate</b>                 |                                 |                              |              |
| Age < 70 yr                     |                                 |                              |              |
| PAQ (1)                         | 0.17                            | 0.19                         | (0.07, 0.31) |
| PAQ (2)                         | 0.27                            | 0.32                         | (0.20, 0.42) |
| PAQ (Avg)                       | 0.25                            | 0.28                         | (0.16, 0.39) |
| ACT24 (2)                       | 0.13                            | 0.15                         | (0.03, 0.28) |
| ACT24 (Avg)                     | 0.21                            | 0.25                         | (0.12, 0.36) |
| Age ≥ 70 yr                     |                                 |                              |              |
| PAQ (1)                         | 0.25                            | 0.26                         | (0.13, 0.37) |
| PAQ (2)                         | 0.19                            | 0.21                         | (0.09, 0.33) |
| PAQ (Avg)                       | 0.24                            | 0.26                         | (0.13, 0.37) |
| ACT24 (2)                       | 0.21                            | 0.23                         | (0.10, 0.36) |

**Web Table 5.** Spearman Correlation Coefficients Comparing the Physical Activity Questionnaire and Multiple Activities Completed Over Time in 24 Hours to Doubly Labeled Water-Determined Physical Activity Level According to Age Group in Men's Lifestyle Validation Study, 2011–2013 (N=609).

| Variable and Measurement No. | DLW-determined PAL <sup>a</sup> |                           |                |
|------------------------------|---------------------------------|---------------------------|----------------|
|                              | Age-Adjusted                    | Deattenuated Age-Adjusted | 95% CI         |
| ACT24 (Avg)                  | 0.27                            | 0.29                      | (0.16, 0.40)   |
| <b>Sedentary</b>             |                                 |                           |                |
| Age < 70 yr                  |                                 |                           |                |
| PAQ (1)                      | -0.11                           | -0.13                     | (-0.24, -0.01) |
| PAQ (2)                      | -0.16                           | -0.19                     | (-0.30, -0.07) |
| PAQ (Avg)                    | -0.15                           | -0.18                     | (-0.29, -0.06) |
| ACT24 (2)                    | -0.12                           | -0.14                     | (-0.27, -0.02) |
| ACT24 (Avg)                  | -0.16                           | -0.19                     | (-0.31, -0.08) |
| Age ≥ 70 yr                  |                                 |                           |                |
| PAQ (1)                      | -0.11                           | -0.12                     | (-0.25, 0.00)  |
| PAQ (2)                      | -0.11                           | -0.12                     | (-0.25, 0.01)  |
| PAQ (Avg)                    | -0.13                           | -0.15                     | (-0.27, -0.02) |
| ACT24 (2)                    | -0.21                           | -0.22                     | (-0.35, -0.09) |
| ACT24 (Avg)                  | -0.27                           | -0.29                     | (-0.40, -0.16) |

DLW: doubly labeled water; PAL: physical activity level; CI: confidence interval; PAQ: physical activity questionnaire; ACT24: Activities Completed Over Time in 24 Hours; PAQ (Avg) indicates average of first and second questionnaires; ACT24 (Avg) indicates average of up to four 24-hour recalls.

<sup>a</sup>PAL was estimated from DLW-total daily energy expenditure (kcal/day) divided by the resting metabolic rate. Resting metabolic rate was predicted based on age, sex, height, and weight as described by Mifflin et al.(11)

**Web Table 6.** Spearman Correlation Coefficients Comparing the Physical Activity Questionnaire and Multiple Activities Completed Over Time in 24 Hours to Doubly Labeled Water-Determined Physical Activity Level According to Body Mass Index Group in Men's Lifestyle Validation Study, 2011–2013 (N=609).

| Variable and Measurement No. | DLW-determined PAL <sup>a</sup> |                           |               |
|------------------------------|---------------------------------|---------------------------|---------------|
|                              | Age-Adjusted                    | Deattenuated Age-Adjusted | 95% CI        |
| <b>Total activity</b>        |                                 |                           |               |
| BMI < 25 kg/m <sup>2</sup>   |                                 |                           |               |
| PAQ (1)                      | 0.38                            | 0.44                      | (0.31, 0.55)  |
| PAQ (2)                      | 0.43                            | 0.43                      | (0.30, 0.55)  |
| PAQ (Avg)                    | 0.43                            | 0.47                      | (0.34, 0.58)  |
| ACT24 (2)                    | 0.20                            | 0.24                      | (0.09, 0.37)  |
| ACT24 (Avg)                  | 0.36                            | 0.43                      | (0.30, 0.55)  |
| BMI ≥ 25 kg/m <sup>2</sup>   |                                 |                           |               |
| PAQ (1)                      | 0.33                            | 0.38                      | (0.27, 0.48)  |
| PAQ (2)                      | 0.36                            | 0.42                      | (0.31, 0.52)  |
| PAQ (Avg)                    | 0.38                            | 0.44                      | (0.34, 0.54)  |
| ACT24 (2)                    | 0.34                            | 0.38                      | (0.27, 0.49)  |
| ACT24 (Avg)                  | 0.35                            | 0.40                      | (0.29, 0.50)  |
| <b>MVPA</b>                  |                                 |                           |               |
| BMI < 25 kg/m <sup>2</sup>   |                                 |                           |               |
| PAQ (1)                      | 0.44                            | 0.51                      | (0.37, 0.62)  |
| PAQ (2)                      | 0.46                            | 0.48                      | (0.36, 0.60)  |
| PAQ (Avg)                    | 0.49                            | 0.53                      | (0.40, 0.64)  |
| ACT24 (2)                    | 0.22                            | 0.27                      | (0.11, 0.40)  |
| ACT24 (Avg)                  | 0.38                            | 0.45                      | (0.32, 0.57)  |
| BMI ≥ 25 kg/m <sup>2</sup>   |                                 |                           |               |
| PAQ (1)                      | 0.34                            | 0.40                      | (0.29, 0.50)  |
| PAQ (2)                      | 0.38                            | 0.44                      | (0.33, 0.54)  |
| PAQ (Avg)                    | 0.39                            | 0.45                      | (0.34, 0.55)  |
| ACT24 (2)                    | 0.33                            | 0.37                      | (0.25, 0.47)  |
| ACT24 (Avg)                  | 0.36                            | 0.40                      | (0.28, 0.50)  |
| <b>Vigorous</b>              |                                 |                           |               |
| BMI < 25 kg/m <sup>2</sup>   |                                 |                           |               |
| PAQ (1)                      | 0.46                            | 0.51                      | (0.38, 0.62)  |
| PAQ (2)                      | 0.43                            | 0.51                      | (0.37, 0.62)  |
| PAQ (Avg)                    | 0.47                            | 0.54                      | (0.41, 0.65)  |
| ACT24 (2)                    | 0.20                            | 0.24                      | (0.09, 0.37)  |
| ACT24 (Avg)                  | 0.36                            | 0.43                      | (0.30, 0.55)  |
| BMI ≥ 25 kg/m <sup>2</sup>   |                                 |                           |               |
| PAQ (1)                      | 0.26                            | 0.30                      | (0.19, 0.41)  |
| PAQ (2)                      | 0.24                            | 0.28                      | (0.17, 0.39)  |
| PAQ (Avg)                    | 0.25                            | 0.30                      | (0.18, 0.40)  |
| ACT24 (2)                    | 0.16                            | 0.18                      | (0.07, 0.30)  |
| ACT24 (Avg)                  | 0.23                            | 0.26                      | (0.14, 0.37)  |
| <b>Moderate</b>              |                                 |                           |               |
| BMI < 25 kg/m <sup>2</sup>   |                                 |                           |               |
| PAQ (1)                      | 0.15                            | 0.18                      | (0.04, 0.32)  |
| PAQ (2)                      | 0.13                            | 0.16                      | (0.02, 0.29)  |
| PAQ (Avg)                    | 0.15                            | 0.18                      | (0.05, 0.32)  |
| ACT24 (2)                    | 0.12                            | 0.14                      | (-0.01, 0.29) |
| ACT24 (Avg)                  | 0.20                            | 0.24                      | (0.11, 0.37)  |
| BMI ≥ 25 kg/m <sup>2</sup>   |                                 |                           |               |
| PAQ (1)                      | 0.21                            | 0.24                      | (0.12, 0.35)  |
| PAQ (2)                      | 0.30                            | 0.35                      | (0.23, 0.45)  |
| PAQ (Avg)                    | 0.29                            | 0.33                      | (0.21, 0.43)  |
| ACT24 (2)                    | 0.21                            | 0.24                      | (0.12, 0.36)  |

**Web Table 6.** Spearman Correlation Coefficients Comparing the Physical Activity Questionnaire and Multiple Activities Completed Over Time in 24 Hours to Doubly Labeled Water-Determined Physical Activity Level According to Body Mass Index Group in Men's Lifestyle Validation Study, 2011–2013 (N=609).

| Variable and Measurement No. | DLW-determined PAL <sup>a</sup> |                           |                |
|------------------------------|---------------------------------|---------------------------|----------------|
|                              | Age-Adjusted                    | Deattenuated Age-Adjusted | 95% CI         |
| ACT24 (Avg)                  | 0.27                            | 0.30                      | (0.18, 0.40)   |
| <b>Sedentary</b>             |                                 |                           |                |
| BMI < 25 kg/m <sup>2</sup>   |                                 |                           |                |
| PAQ (1)                      | -0.11                           | -0.13                     | (-0.27, 0.01)  |
| PAQ (2)                      | -0.19                           | -0.23                     | (-0.37, -0.09) |
| PAQ (Avg)                    | -0.16                           | -0.19                     | (-0.33, -0.06) |
| ACT24 (2)                    | -0.07                           | -0.09                     | (-0.24, 0.07)  |
| ACT24 (Avg)                  | -0.17                           | -0.19                     | (-0.32, -0.05) |
| BMI ≥ 25 kg/m <sup>2</sup>   |                                 |                           |                |
| PAQ (1)                      | -0.11                           | -0.13                     | (-0.24, -0.01) |
| PAQ (2)                      | -0.11                           | -0.12                     | (-0.24, -0.01) |
| PAQ (Avg)                    | -0.13                           | -0.15                     | (-0.26, -0.03) |
| ACT24 (2)                    | -0.20                           | -0.22                     | (-0.34, -0.11) |
| ACT24 (Avg)                  | -0.21                           | -0.24                     | (-0.35, -0.12) |

DLW: doubly labeled water; PAL: physical activity level; CI: confidence interval; PAQ: physical activity questionnaire; ACT24: Activities Completed Over Time in 24 Hours; PAQ (Avg) indicates average of first and second questionnaires; ACT24 (Avg) indicates average of up to four 24-hour recalls.

<sup>a</sup>PAL was estimated from DLW-total daily energy expenditure (kcal/day) divided by the resting metabolic rate. Resting metabolic rate was predicted based on age, sex, height, and weight as described by Mifflin et al. (11).

**Web Table 7.** Spearman Correlation Coefficients Comparing Each Individual Activities Completed Over Time in 24 Hours to Doubly Labeled Water-Determined Physical Activity Level in Men’s Lifestyle Validation Study, 2011–2013.

| Variable and Measurement No. | DLW-determined PAL <sup>a</sup> |                           |                |
|------------------------------|---------------------------------|---------------------------|----------------|
|                              | Age-Adjusted                    | Deattenuated Age-Adjusted | 95% CI         |
| Total activity, MET-hr/day   |                                 |                           |                |
| ACT24 (1)                    | 0.28                            | 0.33                      | (0.24, 0.41)   |
| ACT24 (2)                    | 0.29                            | 0.33                      | (0.24, 0.41)   |
| ACT24 (3)                    | 0.29                            | 0.34                      | (0.25, 0.43)   |
| ACT24 (4)                    | 0.30                            | 0.35                      | (0.26, 0.44)   |
| MVPA, MET-hr/day             |                                 |                           |                |
| ACT24 (1)                    | 0.26                            | 0.31                      | (0.21, 0.39)   |
| ACT24 (2)                    | 0.28                            | 0.33                      | (0.23, 0.41)   |
| ACT24 (3)                    | 0.26                            | 0.29                      | (0.20, 0.38)   |
| ACT24 (4)                    | 0.30                            | 0.35                      | (0.25, 0.43)   |
| Vigorous, MET-hr/day         |                                 |                           |                |
| ACT24 (1)                    | 0.25                            | 0.30                      | (0.20, 0.38)   |
| ACT24 (2)                    | 0.18                            | 0.21                      | (0.11, 0.31)   |
| ACT24 (3)                    | 0.14                            | 0.16                      | (0.07, 0.25)   |
| ACT24 (4)                    | 0.20                            | 0.23                      | (0.13, 0.32)   |
| Moderate, MET-hr/day         |                                 |                           |                |
| ACT24 (1)                    | 0.10                            | 0.11                      | (0.02, 0.20)   |
| ACT24 (2)                    | 0.17                            | 0.20                      | (0.11, 0.29)   |
| ACT24 (3)                    | 0.17                            | 0.20                      | (0.11, 0.30)   |
| ACT24 (4)                    | 0.20                            | 0.23                      | (0.13, 0.32)   |
| Sedentary, hr/day            |                                 |                           |                |
| ACT24 (1)                    | -0.14                           | -0.17                     | (-0.26, -0.08) |
| ACT24 (2)                    | -0.15                           | -0.17                     | (-0.27, -0.08) |
| ACT24 (3)                    | -0.16                           | -0.19                     | (-0.28, -0.10) |
| ACT24 (4)                    | -0.19                           | -0.23                     | (-0.32, -0.13) |

DLW: doubly labeled water; PAL: physical activity level; CI: confidence interval; PAQ: physical activity questionnaire; ACT24: Activities Completed Over Time in 24 Hours.

<sup>a</sup>PAL was estimated from DLW-total daily energy expenditure (kcal/day) divided by the resting metabolic rate. Resting metabolic rate was predicted based on age, sex, height, and weight as described by Mifflin et al. (11).

**Web Table 8.** Spearman Correlation Coefficients Comparing Each Individual Activities Completed Over Time in 24 Hours to the Corresponding Accelerometer-Determined Activity in the Men’s Lifestyle Validation Study, 2011–2013.

| Variable and Measurement No. | Accelerometer <sup>a</sup> |                                    |               |
|------------------------------|----------------------------|------------------------------------|---------------|
|                              | Adjusted <sup>b</sup>      | Deattenuated Adjusted <sup>b</sup> | 95% CI        |
| Total activity, MET-hr/day   |                            |                                    |               |
| ACT24 (1)                    | 0.29                       | 0.32                               | (0.24, 0.39)  |
| ACT24 (2)                    | 0.34                       | 0.37                               | (0.29, 0.44)  |
| ACT24 (3)                    | 0.29                       | 0.32                               | (0.24, 0.39)  |
| ACT24 (4)                    | 0.31                       | 0.34                               | (0.26, 0.42)  |
| MVPA, MET-hr/day             |                            |                                    |               |
| ACT24 (1)                    | 0.20                       | 0.22                               | (0.13, 0.30)  |
| ACT24 (2)                    | 0.29                       | 0.32                               | (0.23, 0.39)  |
| ACT24 (3)                    | 0.23                       | 0.25                               | (0.16, 0.34)  |
| ACT24 (4)                    | 0.27                       | 0.29                               | (0.20, 0.37)  |
| Vigorous, MET-hr/day         |                            |                                    |               |
| ACT24 (1)                    | 0.14                       | 0.16                               | (0.07, 0.25)  |
| ACT24 (2)                    | 0.06                       | 0.08                               | (-0.02, 0.16) |
| ACT24 (3)                    | 0.07                       | 0.08                               | (-0.02, 0.17) |
| ACT24 (4)                    | 0.05                       | 0.05                               | (-0.04, 0.14) |
| Moderate, MET-hr/day         |                            |                                    |               |
| ACT24 (1)                    | 0.13                       | 0.15                               | (0.06, 0.24)  |
| ACT24 (2)                    | 0.25                       | 0.27                               | (0.18, 0.35)  |
| ACT24 (3)                    | 0.20                       | 0.22                               | (0.13, 0.31)  |
| ACT24 (4)                    | 0.24                       | 0.26                               | (0.17, 0.35)  |
| Sedentary, hr/day            |                            |                                    |               |
| ACT24 (1)                    | 0.28                       | 0.30                               | (0.22, 0.38)  |
| ACT24 (2)                    | 0.26                       | 0.28                               | (0.20, 0.37)  |
| ACT24 (3)                    | 0.23                       | 0.24                               | (0.15, 0.33)  |
| ACT24 (4)                    | 0.24                       | 0.26                               | (0.18, 0.35)  |

PAQ: physical activity questionnaire; ACT24: Activities Completed Over Time in 24 Hours; CI: confidence interval.

<sup>a</sup>Measures based on the triaxial vector magnitude. Total activity is based on total activity counts (TAC) per day; accelerometer measures of MVPA, vigorous, and moderate activity include  $\geq 1$  minute bouts; sedentary time is based on  $\geq 15$  minute bouts.

<sup>b</sup>Values from PAQ and ACT24 were adjusted for age (yr); values from accelerometer were adjusted for age (yr) and accelerometer wear time (hr/day).



**Web Table 9.** Spearman Correlation Coefficients Comparing the Physical Activity Questionnaire, Multiple Activities Completed Over 24-Hours, and Accelerometer to Body Fat Percent Measured by Dual Energy X-ray Absorptiometry in the Men's Lifestyle Validation Study, United States, 2011–2013.

| Variable and Measurement No. | DXA-Body Fat Percent (N=197) <sup>a</sup> |                                    |               |
|------------------------------|-------------------------------------------|------------------------------------|---------------|
|                              | Age-Adjusted <sup>a</sup>                 | Deattenuated Adjusted <sup>b</sup> | 95% CI        |
| DLW-PAL (1)                  | -0.47                                     | -0.47                              | -0.57, -0.36) |
| Total activity               |                                           |                                    |               |
| PAQ (1)                      | -0.32                                     | -0.32                              | -0.43, -0.19  |
| PAQ (2)                      | -0.36                                     | -0.37                              | -0.48, -0.24  |
| PAQ (Avg)                    | -0.36                                     | -0.37                              | -0.48, -0.24  |
| ACT24 (2)                    | -0.18                                     | -0.18                              | -0.32, -0.04  |
| ACT24 (Avg)                  | -0.21                                     | -0.20                              | -0.33, -0.07  |
| Accelerometer (Avg)          | -0.35                                     | -0.36                              | -0.47, -0.23  |
| MVPA                         |                                           |                                    |               |
| PAQ (1)                      | -0.32                                     | -0.32                              | -0.43, -0.19  |
| PAQ (2)                      | -0.42                                     | -0.42                              | -0.53, -0.31  |
| PAQ (Avg)                    | -0.39                                     | -0.39                              | -0.50, -0.27  |
| ACT24 (2)                    | -0.16                                     | -0.16                              | -0.31, -0.02  |
| ACT24 (Avg)                  | -0.21                                     | -0.22                              | -0.35, -0.09  |
| Accelerometer (Avg)          | -0.29                                     | -0.30                              | -0.41, -0.17  |
| Vigorous                     |                                           |                                    |               |
| PAQ (1)                      | -0.37                                     | -0.38                              | -0.49, -0.25  |
| PAQ (2)                      | -0.35                                     | -0.36                              | -0.47, -0.23  |
| PAQ (Avg)                    | -0.37                                     | -0.37                              | -0.48, -0.25  |
| ACT24 (2)                    | -0.11                                     | -0.10                              | -0.24, 0.05   |
| ACT24 (Avg)                  | -0.23                                     | -0.23                              | -0.36, -0.10  |
| Accelerometer (Avg)          | -0.29                                     | -0.29                              | -0.41, -0.16  |
| Moderate                     |                                           |                                    |               |
| PAQ (1)                      | -0.05                                     | -0.05                              | -0.18, 0.09   |
| PAQ (2)                      | -0.25                                     | -0.26                              | -0.38, -0.12  |
| PAQ (Avg)                    | -0.16                                     | -0.16                              | -0.30, -0.03  |
| ACT24 (2)                    | -0.05                                     | -0.05                              | -0.19, 0.10   |
| ACT24 (Avg)                  | -0.08                                     | -0.08                              | -0.21, 0.06   |
| Accelerometer (Avg)          | -0.25                                     | -0.26                              | -0.37, -0.12  |
| Sedentary time               |                                           |                                    |               |
| PAQ (1)                      | -0.02                                     | -0.02                              | -0.16, 0.11   |
| PAQ (2)                      | -0.01                                     | -0.01                              | -0.14, 0.12   |
| PAQ (Avg)                    | -0.04                                     | -0.04                              | -0.17, 0.10   |
| ACT24 (2)                    | -0.01                                     | -0.01                              | -0.16, 0.13   |
| ACT24 (Avg)                  | 0.00                                      | 0.00                               | -0.13, 0.13   |
| Accelerometer (Avg)          | 0.32                                      | 0.32                               | 0.19, 0.43    |

DXA: dual energy X-ray absorptiometry; CI: confidence interval; PAQ: physical activity questionnaire; ACT24: Activities Completed Over Time in 24-Hours; PAQ (Avg) indicates average of first and second questionnaires; ACT24 (Avg) indicates average of up to four 24-hour recalls; Accelerometer (Avg) indicates average of up to two measures.

<sup>a</sup>For ACT24 (2), n=169 in DXA analysis.

<sup>b</sup>Accelerometer measures additionally adjusted for wear time (hr/day).

**Web Table 10.** Spearman Correlation Coefficients Comparing Each Individual Activities Completed Over 24-Hours and Accelerometer Measure to Resting Pulse Rate and Percent Body Fat as Measured by Doubly Labeled Water and Dual Energy X-ray Absorptiometry in the Men’s Lifestyle Validation Study, 2011–2013

| Variable and Measurement No. | RPR (N=479)           |                                    |                | DLW-Percent body fat (N=609) |                                    |                | DXA-Percent body fat (N=197) |                                    |                |
|------------------------------|-----------------------|------------------------------------|----------------|------------------------------|------------------------------------|----------------|------------------------------|------------------------------------|----------------|
|                              | Adjusted <sup>a</sup> | Deattenuated Adjusted <sup>a</sup> | 95% CI         | Adjusted <sup>a</sup>        | Deattenuated Adjusted <sup>a</sup> | 95% CI         | Adjusted <sup>a</sup>        | Deattenuated Adjusted <sup>a</sup> | 95% CI         |
| <b>Total activity</b>        |                       |                                    |                |                              |                                    |                |                              |                                    |                |
| ACT24 (1)                    | -0.12                 | -0.13                              | (-0.22, -0.03) | -0.19                        | -0.20                              | (-0.28, -0.11) | -0.23                        | -0.23                              | (-0.37, -0.10) |
| ACT24 (2)                    | -0.11                 | -0.11                              | (-0.21, -0.02) | -0.16                        | -0.17                              | (-0.25, -0.09) | -0.18                        | -0.18                              | (-0.32, -0.04) |
| ACT24 (3)                    | -0.04                 | -0.04                              | (-0.13, 0.06)  | -0.17                        | -0.17                              | (-0.26, -0.09) | -0.11                        | -0.11                              | (-0.26, 0.04)  |
| ACT24 (4)                    | -0.21                 | -0.17                              | (-0.27, -0.08) | -0.14                        | -0.14                              | (-0.23, -0.06) | -0.14                        | -0.15                              | (-0.29, 0.00)  |
| Accelerometer (1)            | -0.18                 | -0.19                              | (-0.28, -0.10) | -0.32                        | -0.34                              | (-0.40, -0.27) | -0.35                        | -0.35                              | (-0.46, -0.23) |
| Accelerometer (2)            | -0.20                 | -0.19                              | (-0.29, -0.10) | -0.31                        | -0.32                              | (-0.39, -0.24) | -0.31                        | -0.31                              | (-0.43, -0.17) |
| <b>MVPA</b>                  |                       |                                    |                |                              |                                    |                |                              |                                    |                |
| ACT24 (1)                    | -0.14                 | -0.14                              | (-0.24, -0.05) | -0.19                        | -0.19                              | (-0.28, -0.11) | -0.20                        | -0.21                              | (-0.34, -0.07) |
| ACT24 (2)                    | -0.09                 | -0.09                              | (-0.19, 0.00)  | -0.13                        | -0.14                              | (-0.22, -0.05) | -0.16                        | -0.16                              | (-0.31, -0.02) |
| ACT24 (3)                    | -0.05                 | -0.03                              | (-0.12, 0.07)  | -0.15                        | -0.16                              | (-0.24, -0.08) | -0.13                        | -0.13                              | (-0.27, 0.02)  |
| ACT24 (4)                    | -0.66                 | -0.22                              | (-0.32, -0.12) | -0.15                        | -0.16                              | (-0.24, -0.08) | -0.15                        | -0.15                              | (-0.29, -0.01) |
| Accelerometer (1)            | -0.18                 | -0.19                              | (-0.28, -0.10) | -0.27                        | -0.28                              | (-0.36, -0.21) | -0.30                        | -0.30                              | (-0.42, -0.17) |
| Accelerometer (2)            | -0.20                 | -0.20                              | (-0.29, -0.11) | -0.24                        | -0.25                              | (-0.34, -0.17) | -0.24                        | -0.25                              | (-0.37, -0.11) |
| <b>Vigorous</b>              |                       |                                    |                |                              |                                    |                |                              |                                    |                |
| ACT24 (1)                    | -0.10                 | -0.11                              | (-0.20, -0.01) | -0.26                        | -0.25                              | (-0.34, -0.17) | -0.30                        | -0.29                              | (-0.41, -0.16) |
| ACT24 (2)                    | -0.05                 | -0.05                              | (-0.15, 0.05)  | -0.11                        | -0.11                              | (-0.19, -0.03) | -0.11                        | -0.10                              | (-0.24, 0.05)  |
| ACT24 (3)                    | -0.17                 | -0.15                              | (-0.24, -0.05) | -0.11                        | -0.11                              | (-0.20, -0.03) | -0.10                        | -0.10                              | (-0.24, 0.05)  |
| ACT24 (4)                    | -0.18                 | -0.19                              | (-0.28, -0.10) | -0.14                        | -0.15                              | (-0.23, -0.06) | -0.17                        | -0.17                              | (-0.31, -0.03) |
| Accelerometer (1)            | -0.21                 | -0.23                              | (-0.31, -0.13) | -0.27                        | -0.28                              | (-0.36, -0.21) | -0.31                        | -0.32                              | (-0.43, -0.19) |
| Accelerometer (2)            | -0.63                 | -0.23                              | (-0.32, -0.13) | -0.23                        | -0.25                              | (-0.33, -0.16) | -0.21                        | -0.22                              | (-0.35, -0.08) |
| <b>Moderate</b>              |                       |                                    |                |                              |                                    |                |                              |                                    |                |
| ACT24 (1)                    | -0.06                 | -0.06                              | (-0.15, 0.04)  | -0.05                        | -0.06                              | (-0.14, 0.03)  | -0.04                        | -0.04                              | (-0.17, 0.11)  |
| ACT24 (2)                    | 0.01                  | 0.02                               | (-0.08, 0.11)  | -0.03                        | -0.03                              | (-0.11, 0.05)  | -0.05                        | -0.05                              | (-0.19, 0.10)  |
| ACT24 (3)                    | 0.03                  | 0.04                               | (-0.06, 0.13)  | -0.11                        | -0.11                              | (-0.20, -0.03) | -0.13                        | -0.13                              | (-0.27, 0.02)  |
| ACT24 (4)                    | -0.18                 | -0.15                              | (-0.24, -0.06) | -0.08                        | -0.09                              | (-0.17, 0.00)  | -0.04                        | -0.04                              | (-0.19, 0.10)  |
| Accelerometer (1)            | -0.14                 | -0.15                              | (-0.24, -0.06) | -0.24                        | -0.25                              | (-0.33, -0.17) | -0.26                        | -0.26                              | (-0.37, -0.12) |
| Accelerometer (2)            | -0.16                 | -0.16                              | (-0.25, -0.06) | -0.21                        | -0.22                              | (-0.31, -0.14) | -0.20                        | -0.20                              | (-0.34, -0.06) |
| <b>Sedentary time</b>        |                       |                                    |                |                              |                                    |                |                              |                                    |                |
| ACT24 (1)                    | 0.02                  | 0.04                               | (-0.06, 0.13)  | 0.07                         | 0.07                               | (-0.01, 0.16)  | 0.07                         | 0.07                               | (-0.08, 0.21)  |
| ACT24 (2)                    | 0.04                  | 0.04                               | (-0.06, 0.13)  | 0.06                         | 0.07                               | (-0.02, 0.15)  | -0.01                        | -0.01                              | (-0.16, 0.13)  |
| ACT24 (3)                    | 0.00                  | 0.00                               | (-0.10, 0.10)  | 0.07                         | 0.07                               | (-0.02, 0.15)  | -0.06                        | -0.06                              | (-0.20, 0.09)  |
| ACT24 (4)                    | 0.11                  | 0.12                               | (0.02, 0.21)   | 0.10                         | 0.10                               | (0.02, 0.19)   | 0.03                         | 0.03                               | (-0.11, 0.17)  |
| Accelerometer (1)            | 0.13                  | 0.10                               | (0.01, 0.19)   | 0.29                         | 0.31                               | (0.23, 0.37)   | 0.31                         | 0.31                               | (0.18, 0.42)   |
| Accelerometer (2)            | 0.07                  | 0.07                               | (-0.03, 0.16)  | 0.28                         | 0.30                               | (0.22, 0.37)   | 0.25                         | 0.25                               | (0.11, 0.38)   |

DXA: dual energy X-ray absorptiometry; RPR: resting pulse rate; CI: confidence interval; PAQ: physical activity questionnaire; ACT24: Activities Completed Over Time in 24-Hours.

<sup>a</sup>DXA, DLW, PAQ, ACT24, and RPR adjusted for age (yr), accelerometer adjusted for age (yr) and wear time (h/day).

**Web Table 11.** Validity Coefficients<sup>a</sup> Showing Correlations with True Physical Activity for Physical Activity Estimated From the Second Physical Activity Questionnaire, Activities Completed Over Time in 24-Hours, Accelerometry, and Doubly Labeled Water-Determined Physical Activity Energy Expenditure in the Men’s Lifestyle Validation Study, 2011–2013.

|                      | N   | r <sub>QR</sub> | r <sub>QM</sub> | r <sub>RM</sub> | VC <sub>QT</sub> | 95% CI       | VC <sub>RT</sub> | 95% CI       | VC <sub>MT</sub> | 95% CI       |
|----------------------|-----|-----------------|-----------------|-----------------|------------------|--------------|------------------|--------------|------------------|--------------|
| <b>Q=PAQ (2)</b>     |     |                 |                 |                 |                  |              |                  |              |                  |              |
| Total activity       | 516 | 0.40            | 0.38            | 0.42            | 0.61             | (0.53, 0.70) | 0.66             | (0.59, 0.75) | 0.63             | (0.55, 0.73) |
| MVPA                 | 516 | 0.37            | 0.41            | 0.31            | 0.70             | (0.61, 0.81) | 0.52             | (0.44, 0.62) | 0.59             | (0.50, 0.70) |
| Vigorous             | 516 | 0.29            | 0.33            | 0.16            | 0.77             | (0.61, 0.98) | 0.37             | (0.28, 0.48) | 0.42             | (0.31, 0.57) |
| Moderate             | 516 | 0.34            | 0.25            | 0.29            | 0.54             | (0.44, 0.66) | 0.63             | (0.51, 0.77) | 0.46             | (0.37, 0.59) |
| <b>Q=ACT24 (Avg)</b> |     |                 |                 |                 |                  |              |                  |              |                  |              |
| Total activity       | 516 | 0.38            | 0.35            | 0.42            | 0.56             | (0.47, 0.66) | 0.67             | (0.59, 0.77) | 0.62             | (0.53, 0.72) |
| MVPA                 | 516 | 0.32            | 0.36            | 0.31            | 0.61             | (0.52, 0.72) | 0.52             | (0.43, 0.63) | 0.59             | (0.49, 0.70) |
| Vigorous             | 516 | 0.12            | 0.26            | 0.16            | 0.44             | (0.30, 0.65) | 0.27             | (0.17, 0.42) | 0.58             | (0.40, 0.84) |
| Moderate             | 516 | 0.27            | 0.25            | 0.29            | 0.49             | (0.39, 0.62) | 0.56             | (0.44, 0.70) | 0.52             | (0.41, 0.66) |

VC: Validity coefficient; MVPA: moderate to vigorous physical activity; DLW: doubly labeled water; PAEE: physical activity energy expenditure.

r: Correlation between the PAQ (2) or average ACT24 and the accelerometer ( $r_{QR}$ ), the PAQ (2) or average ACT24 and DLW-PAEE ( $r_{QM}$ ), or the accelerometer and DLW-PAEE ( $r_{RM}$ ).

<sup>a</sup>Q=Second PAQ adjusted for age or the average of up to four ACT24 recalls adjusted for age; R=Accelerometer-determined activity adjusted for age and wear time; M=DLW-determined PAEE adjusted for age; T= true physical activity. This analysis was restricted to men with two accelerometer measures.

**Web Table 12.** Validity Coefficients<sup>a</sup> Showing Correlations with True Physical Activity for Physical Activity Estimated From the Second Physical Activity Questionnaire, Activities Completed Over Time in 24-Hours, Accelerometry, and Body Size-Adjusted Doubly Labeled Water-Determined Physical Activity Energy Expenditure in the Men’s Lifestyle Validation Study, 2011–2013.

|                      | N   | r <sub>QR</sub> | r <sub>QM</sub> | r <sub>RM</sub> | VC <sub>QT</sub> | 95% CI     | VC <sub>RT</sub> | 95% CI       | VC <sub>MT</sub> | 95% CI       |
|----------------------|-----|-----------------|-----------------|-----------------|------------------|------------|------------------|--------------|------------------|--------------|
| <b>Q=PAQ (2)</b>     |     |                 |                 |                 |                  |            |                  |              |                  |              |
| Total activity       | 516 | 0.40            | 0.38            | 0.41            | 0.61             | 0.53, 0.7  | 0.66             | (0.58, 0.75) | 0.62             | (0.53, 0.71) |
| MVPA                 | 516 | 0.37            | 0.40            | 0.30            | 0.71             | 0.61, 0.82 | 0.52             | (0.44, 0.62) | 0.57             | (0.48, 0.69) |
| Vigorous             | 516 | 0.29            | 0.32            | 0.15            | 0.78             | 0.61, 0.99 | 0.37             | (0.28, 0.49) | 0.41             | (0.30, 0.56) |
| Moderate             | 516 | 0.34            | 0.24            | 0.28            | 0.54             | 0.44, 0.67 | 0.62             | (0.51, 0.77) | 0.45             | (0.36, 0.58) |
| <b>Q=ACT24 (Avg)</b> |     |                 |                 |                 |                  |            |                  |              |                  |              |
| Total activity       | 516 | 0.38            | 0.34            | 0.41            | 0.56             | 0.48, 0.67 | 0.67             | (0.58, 0.76) | 0.61             | (0.52, 0.71) |
| MVPA                 | 516 | 0.32            | 0.36            | 0.30            | 0.62             | 0.52, 0.73 | 0.52             | (0.42, 0.63) | 0.58             | (0.48, 0.70) |
| Vigorous             | 516 | 0.12            | 0.25            | 0.15            | 0.45             | 0.30, 0.66 | 0.27             | (0.17, 0.42) | 0.56             | (0.39, 0.82) |
| Moderate             | 516 | 0.27            | 0.25            | 0.28            | 0.49             | 0.39, 0.62 | 0.55             | (0.44, 0.70) | 0.51             | (0.40, 0.65) |

VC: Validity coefficient; MVPA: moderate to vigorous physical activity; DLW: doubly labeled water; PAEE: physical activity energy expenditure; r: Correlation between the PAQ (2) or average ACT24 and the accelerometer ( $r_{QR}$ ), the PAQ (2) or average ACT24 and DLW-PAEE ( $r_{QM}$ ), or the accelerometer and DLW-PAEE ( $r_{RM}$ ).

<sup>a</sup>Q=Second PAQ adjusted for age or the average of up to four ACT24 recalls adjusted for age; R=Accelerometer-determined activity adjusted for age and wear time; M=DLW-determined PAEE adjusted for age and weight; T= true physical activity. This analysis was restricted to men with two accelerometer measures.
